# Supplementary material
Source: publisher site journal article supplement (https://natureconservation.pensoft.net/article/28651/download/suppl/33/)
Supplement: Supplementary file 1

## Sheet: Metadata
S3, Data
Posts (Facebook)
Search term ‘pangolin wildlife trade’; included date, original poster, and reactions to posts (number of ‘likes’, comments and ‘shares’), collated per year for 2005 to 2016, and per day for 2015 – 2016
News articles
Primary articles (where the search term – “pangolin” - appeared in the headline or first paragraph) in ‘all news, all languages’ published between 2005 and 2016; number of news articles (including the same articles published in different outlets) collated per year for 2005 – 2016, and per day for 2015 – 2016.
Google Trends (GT)
Google-based web searches for ‘pangolins’ (animal) as topic, across the internet (web search), all categories, worldwide, at a monthly resolution for 2005 – 2016, and separately (at a weekly resolution) for 2015 – 2016 (daily resolution data were not available). GT does not provide absolute counts of google searches, but gives Relative Search Volume (RSV) which represents searches relative to the…

## Sheet: Posts and News 2005-2016
Facebook posts (and response) and news articles - annual data 2005 - 2016
Year	Posts	Comments	Likes	Shares	New/unique posts	Active FB users (M)	News
2005	0	0	0	0	0	0	51
2006	0	0	0	0	0	0	40
2007	0	0	0	0	0	0	32
2008	3	0	0	0	3	100	39
2009	7	33	19	0	7	276	41
2010	36	27	34	0	27	518	51
2011	75	414	4081	379	54	766	79
2012	212	1012	2618	3921	155	980	108
2013	525	1845	8659	5191	355	1171	137
2014	820	5191	50133	16734	514	1334	167
2015	398	2847	59685	14424	227	1517	251
2016	4168	11329	246556	48428	2426	1754	449
	Figure showing number of Facebook posts relative to the number of active Facebook users

## Sheet: GT 2005-2016
Google Trends relative search volume, per month 2005-2016
Number of Wikipedia pageviews, per month and per day from July 2015
Month	GT	Wikipedia			Day	Wikipedia
2005-01	15				2015-07-01	1329
2005-02	11				2015-07-02	1295
2005-03	14				2015-07-03	1175
2005-04	10				2015-07-04	1075
2005-05	12				2015-07-05	1599
2005-06	12				2015-07-06	1742
2005-07	10				2015-07-07	1502
2005-08	8				2015-07-08	1736
2005-09	10				2015-07-09	2258
2005-10	17				2015-07-10	2253
2005-11	9				2015-07-11	1836
2005-12	9				2015-07-12	2476
2006-01	10				2015-07-13	2849
2006-02	11				2015-07-14	2096
2006-03	12				2015-07-15	1860
2006-04	11				2015-07-16	1557
2006-05	10				2015-07-17	1399
2006-06	9				2015-07-18	1361
2006-07	7				2015-07-19	1265
2006-08	7				2015-07-20	1308
2006-09	8				2015-07-21	1476
2006-10	8				2015-07-22	1582
2006-11	9				2015-07-23	1356
2006-12	11				2015-07-24	1353
2007-01	8				2015-07-25	1882
2007-02	10				2015-07-26	1974
2007-03	10				2015-07-27	1669
2007-04	11				2015-07-28	2042
2007-05	27				2015-07-29	2053
2007-06	10				2015-07-30	1844
2007-07	8				2015-07-31	1441
2007-08	8				2015-08-01	1973
2007-09	8				2015-08-02	1943
2007-10	10				2015-08-03	2867
2007-11	19				2015-08-04	1807
2007-12	8				2015-08-05	1885
2008-01	11				2015-08-06	1522
2008-02	12				2015-08-07	1430
2008-03	11				2015-08-08	1642
2008-04	11				2015-08-09	1389
2008-05	10				2015-08-10	1467
2008-06	9				2015-08-11	1409
2008-07	9				2015-08-12	1967
2008-08	10				2015-08-13	1814
2008-09	9				2015-08-14	1433
2008-10	9				2015-08-15	1315
2008-11	10				2015-08-16	1421
2008-12	12				2015-08-17	1434
2009-01	10				2015-08-18	13419
2009-02	10				2015-08-19	10184
2009-03	10				2015-08-20	3556
2009-04	9				2015-08-21	2208
2009-05	12				2015-08-22	1841
2009-06	17				2015-08-23	1988
2009-07	13				2015-08-24	1654
2009-08	10				2015-08-25	1840
2009-09	10				2015-08-26	1810
2009-10	11				2015-08-27	1630
2009-11	12				2015-08-28	1422
2009-12	14				2015-08-29	1311
2010-01	10				2015-08-30	1433
2010-02	11				2015-08-31	1613
2010-03	12				2015-09-01	1496
2010-04	14				2015-09-02	1410
2010-05	13				2015-09-03	1423
2010-06	11				2015-09-04	1307
2010-07	11				2015-09-05	4106
2010-08	10				2015-09-06	1586
2010-09	11				2015-09-07	1442
2010-10	15				2015-09-08	1654
2010-11	13				2015-09-09	1633
2010-12	12				2015-09-10	2150
2011-01	12				2015-09-11	1914
2011-02	12				2015-09-12	1895
2011-03	13				2015-09-13	1785
2011-04	16				2015-09-14	2287
2011-05	15				2015-09-15	1735
2011-06	12				2015-09-16	1978
2011-07	13				2015-09-17	1600
2011-08	11				2015-09-18	1494
2011-09	18				2015-09-19	1304
2011-10	19				2015-09-20	1312
2011-11	15				2015-09-21	1620
2011-12	17				2015-09-22	1413
2012-01	16				2015-09-23	1317
2012-02	17				2015-09-24	1487
2012-03	21				2015-09-25	1279
2012-04	32				2015-09-26	1205
2012-05	33				2015-09-27	1316
2012-06	25				2015-09-28	1381
2012-07	18				2015-09-29	1428
2012-08	21				2015-09-30	1629
2012-09	23				2015-10-01	1421
2012-10	22				2015-10-02	1558
2012-11	23				2015-10-03	1160
2012-12	17				2015-10-04	2608
2013-01	18				2015-10-05	2598
2013-02	21				2015-10-06	1894
2013-03	27				2015-10-07	1507
2013-04	44				2015-10-08	1595
2013-05	26				2015-10-09	1625
2013-06	18				2015-10-10	1972
2013-07	18				2015-10-11	1856
2013-08	19				2015-10-12	1466
2013-09	18				2015-10-13	1426
2013-10	19				2015-10-14	1588
2013-11	22				2015-10-15	1491
2013-12	16				2015-10-16	1398
2014-01	19				2015-10-17	1159
2014-02	26				2015-10-18	1315
2014-03	26				2015-10-19	6828
2014-04	40				2015-10-20	8420
2014-05	20				2015-10-21	1960
2014-06	20				2015-10-22	1769
2014-07	25				2015-10-23	1949
2014-08	31				2015-10-24	1494
2014-09	21				2015-10-25	1481
2014-10	17				2015-10-26	2130
2014-11	25				2015-10-27	1827
2014-12	20				2015-10-28	1718
2015-01	24				2015-10-29	1559
2015-02	29				2015-10-30	1432
2015-03	25				2015-10-31	1313
2015-04	100				2015-11-01	1264
2015-05	27				2015-11-02	7192
2015-06	20				2015-11-03	8415
2015-07	20	52643			2015-11-04	6788
2015-08	28	74627			2015-11-05	4961
2015-09	22	49586			2015-11-06	3357
2015-10	19	63517			2015-11-07	2467
2015-11	36	128152			2015-11-08	2434
2015-12	29	75906			2015-11-09	2842
2016-01	23	64085			2015-11-10	5504
2016-02	24	71135			2015-11-11	5769
2016-03	24	74024			2015-11-12	2759
2016-04	33	107747			2015-11-13	1983
2016-05	26	78765			2015-11-14	1635
2016-06	28	74677			2015-11-15	1872
2016-07	24	70468			2015-11-16	1909
2016-08	56	181739			2015-11-17	10141
2016-09	46	161012			2015-11-18	3278
2016-10	51	174670			2015-11-19	2276
2016-11	37	125160			2015-11-20	1947
2016-12	39	144087			2015-11-21	1845
					2015-11-22	2685
					2015-11-23	3322
					2015-11-24	2697
					2015-11-25	2237
					2015-11-26	14047
					2015-11-27	7686
					2015-11-28	6643
					2015-11-29	4134
					2015-11-30	4063
					2015-12-01	2821
					2015-12-02	2086
					2015-12-03	2037
					2015-12-04	2480
					2015-12-05	1595
					2015-12-06	1447
					2015-12-07	1703
					2015-12-08	1715
					2015-12-09	2041
					2015-12-10	2259
					2015-12-11	1730
					2015-12-12	1443
					2015-12-13	1625
					2015-12-14	1647
					2015-12-15	1496
					2015-12-16	1952
					2015-12-17	3951
					2015-12-18	5998
					2015-12-19	2781
					2015-12-20	1803
					2015-12-21	6751
					2015-12-22	6654
					2015-12-23	3156
					2015-12-24	1900
					2015-12-25	1507
					2015-12-26	1715
					2015-12-27	1700
					2015-12-28	2537
					2015-12-29	2001
					2015-12-30	1739
					2015-12-31	1636
					2016-01-01	1432
					2016-01-02	1387
					2016-01-03	1379
					2016-01-04	1488
					2016-01-05	1597
					2016-01-06	1529
					2016-01-07	1418
					2016-01-08	1457
					2016-01-09	1546
					2016-01-10	1542
					2016-01-11	1534
					2016-01-12	1498
					2016-01-13	1521
					2016-01-14	1589
					2016-01-15	1654
					2016-01-16	1354
					2016-01-17	1538
					2016-01-18	1526
					2016-01-19	3740
					2016-01-20	4051
					2016-01-21	2203
					2016-01-22	2941
					2016-01-23	2148
					2016-01-24	2297
					2016-01-25	5263
					2016-01-26	4519
					2016-01-27	2642
					2016-01-28	2329
					2016-01-29	1816
					2016-01-30	1604
					2016-01-31	1543
					2016-02-01	1743
					2016-02-02	1977
					2016-02-03	1815
					2016-02-04	1934
					2016-02-05	1697
					2016-02-06	1340
					2016-02-07	1515
					2016-02-08	1412
					2016-02-09	1844
					2016-02-10	1587
					2016-02-11	1562
					2016-02-12	1765
					2016-02-13	1451
					2016-02-14	1355
					2016-02-15	1545
					2016-02-16	2152
					2016-02-17	3346
					2016-02-18	4510
					2016-02-19	5163
					2016-02-20	8031
					2016-02-21	5432
					2016-02-22	3548
					2016-02-23	2488
					2016-02-24	2093
					2016-02-25	2222
					2016-02-26	1751
					2016-02-27	1873
					2016-02-28	2059
					2016-02-29	1925
					2016-03-01	2362
					2016-03-02	1877
					2016-03-03	1797
					2016-03-04	1796
					2016-03-05	10275
					2016-03-06	8907
					2016-03-07	3011
					2016-03-08	1988
					2016-03-09	1770
					2016-03-10	1662
					2016-03-11	1697
					2016-03-12	1485
					2016-03-13	1639
					2016-03-14	1691
					2016-03-15	2131
					2016-03-16	1721
					2016-03-17	1959
					2016-03-18	1974
					2016-03-19	1603
					2016-03-20	1928
					2016-03-21	2782
					2016-03-22	1929
					2016-03-23	1637
					2016-03-24	1491
					2016-03-25	1457
					2016-03-26	1823
					2016-03-27	2216
					2016-03-28	1940
					2016-03-29	2075
					2016-03-30	1791
					2016-03-31	1610
					2016-04-01	1507
					2016-04-02	1577
					2016-04-03	1543
					2016-04-04	1870
					2016-04-05	1814
					2016-04-06	1792
					2016-04-07	1854
					2016-04-08	1803
					2016-04-09	2933
					2016-04-10	2673
					2016-04-11	2328
					2016-04-12	2260
					2016-04-13	2537
					2016-04-14	2508
					2016-04-15	1975
					2016-04-16	1916
					2016-04-17	3099
					2016-04-18	9259
					2016-04-19	6836
					2016-04-20	6156
					2016-04-21	4478
					2016-04-22	4100
					2016-04-23	4814
					2016-04-24	5062
					2016-04-25	6801
					2016-04-26	4957
					2016-04-27	4028
					2016-04-28	4036
					2016-04-29	5829
					2016-04-30	5402
					2016-05-01	3084
					2016-05-02	3848
					2016-05-03	3144
					2016-05-04	2873
					2016-05-05	3604
					2016-05-06	2609
					2016-05-07	1805
					2016-05-08	1905
					2016-05-09	3054
					2016-05-10	1925
					2016-05-11	2234
					2016-05-12	2254
					2016-05-13	2335
					2016-05-14	4669
					2016-05-15	2048
					2016-05-16	2210
					2016-05-17	2528
					2016-05-18	2218
					2016-05-19	2128
					2016-05-20	2873
					2016-05-21	2531
					2016-05-22	1936
					2016-05-23	2321
					2016-05-24	2150
					2016-05-25	2417
					2016-05-26	2710
					2016-05-27	3050
					2016-05-28	2420
					2016-05-29	2046
					2016-05-30	1856
					2016-05-31	1980
					2016-06-01	1862
					2016-06-02	2037
					2016-06-03	2417
					2016-06-04	2073
					2016-06-05	2138
					2016-06-06	2395
					2016-06-07	1805
					2016-06-08	1780
					2016-06-09	2036
					2016-06-10	2816
					2016-06-11	2273
					2016-06-12	1803
					2016-06-13	1859
					2016-06-14	1860
					2016-06-15	1816
					2016-06-16	1787
					2016-06-17	3611
					2016-06-18	3917
					2016-06-19	2651
					2016-06-20	3189
					2016-06-21	2517
					2016-06-22	1973
					2016-06-23	2082
					2016-06-24	2915
					2016-06-25	2156
					2016-06-26	1941
					2016-06-27	2443
					2016-06-28	6083
					2016-06-29	3806
					2016-06-30	2636
					2016-07-01	2187
					2016-07-02	1836
					2016-07-03	1779
					2016-07-04	1940
					2016-07-05	1880
					2016-07-06	1580
					2016-07-07	2404
					2016-07-08	3544
					2016-07-09	1798
					2016-07-10	1867
					2016-07-11	1697
					2016-07-12	9266
					2016-07-13	2768
					2016-07-14	1658
					2016-07-15	1440
					2016-07-16	1373
					2016-07-17	1607
					2016-07-18	1660
					2016-07-19	1681
					2016-07-20	2515
					2016-07-21	2481
					2016-07-22	2516
					2016-07-23	2462
					2016-07-24	2720
					2016-07-25	2193
					2016-07-26	1762
					2016-07-27	1630
					2016-07-28	2157
					2016-07-29	2220
					2016-07-30	2015
					2016-07-31	1832
					2016-08-01	2408
					2016-08-02	2018
					2016-08-03	2259
					2016-08-04	2348
					2016-08-05	1830
					2016-08-06	1861
					2016-08-07	2015
					2016-08-08	1941
					2016-08-09	1751
					2016-08-10	6061
					2016-08-11	3028
					2016-08-12	2271
					2016-08-13	2756
					2016-08-14	2514
					2016-08-15	2549
					2016-08-16	2583
					2016-08-17	2549
					2016-08-18	2261
					2016-08-19	2391
					2016-08-20	2831
					2016-08-21	2558
					2016-08-22	3067
					2016-08-23	2663
					2016-08-24	2534
					2016-08-25	2526
					2016-08-26	52869
					2016-08-27	44595
					2016-08-28	7539
					2016-08-29	4822
					2016-08-30	3989
					2016-08-31	4352
					2016-09-01	4748
					2016-09-02	5718
					2016-09-03	4754
					2016-09-04	4582
					2016-09-05	5318
					2016-09-06	3790
					2016-09-07	3950
					2016-09-08	3492
					2016-09-09	3294
					2016-09-10	2459
					2016-09-11	2615
					2016-09-12	2573
					2016-09-13	3742
					2016-09-14	9901
					2016-09-15	3629
					2016-09-16	3650
					2016-09-17	3734
					2016-09-18	3080
					2016-09-19	3091
					2016-09-20	2776
					2016-09-21	7768
					2016-09-22	2784
					2016-09-23	2487
					2016-09-24	2720
					2016-09-25	4528
					2016-09-26	12074
					2016-09-27	5620
					2016-09-28	13188
					2016-09-29	13961
					2016-09-30	14986
					2016-10-01	10202
					2016-10-02	9792
					2016-10-03	6361
					2016-10-04	4744
					2016-10-05	9988
					2016-10-06	5088
					2016-10-07	3757
					2016-10-08	6262
					2016-10-09	6468
					2016-10-10	3935
					2016-10-11	3253
					2016-10-12	3379
					2016-10-13	3975
					2016-10-14	2917
					2016-10-15	2787
					2016-10-16	2934
					2016-10-17	2668
					2016-10-18	4352
					2016-10-19	17309
					2016-10-20	9220
					2016-10-21	6023
					2016-10-22	3840
					2016-10-23	5403
					2016-10-24	6484
					2016-10-25	8607
					2016-10-26	4601
					2016-10-27	5331
					2016-10-28	4101
					2016-10-29	4594
					2016-10-30	2919
					2016-10-31	3376
					2016-11-01	3238
					2016-11-02	7212
					2016-11-03	10399
					2016-11-04	6443
					2016-11-05	3783
					2016-11-06	3545
					2016-11-07	3487
					2016-11-08	3094
					2016-11-09	2728
					2016-11-10	2897
					2016-11-11	2299
					2016-11-12	3649
					2016-11-13	3460
					2016-11-14	2964
					2016-11-15	5138
					2016-11-16	4538
					2016-11-17	4107
					2016-11-18	4569
					2016-11-19	4282
					2016-11-20	6391
					2016-11-21	5632
					2016-11-22	4577
					2016-11-23	3842
					2016-11-24	3154
					2016-11-25	3001
					2016-11-26	3160
					2016-11-27	4150
					2016-11-28	3529
					2016-11-29	2913
					2016-11-30	2979
					2016-12-01	3052
					2016-12-02	3005
					2016-12-03	5731
					2016-12-04	5590
					2016-12-05	4119
					2016-12-06	3826
					2016-12-07	4377
					2016-12-08	3985
					2016-12-09	4164
					2016-12-10	3831
					2016-12-11	3764
					2016-12-12	4428
					2016-12-13	3157
					2016-12-14	3068
					2016-12-15	3282
					2016-12-16	3291
					2016-12-17	5221
					2016-12-18	4568
					2016-12-19	5118
					2016-12-20	3768
					2016-12-21	2808
					2016-12-22	5271
					2016-12-23	3208
					2016-12-24	2651
					2016-12-25	2856
					2016-12-26	2566
					2016-12-27	2403
					2016-12-28	16590
					2016-12-29	13521
					2016-12-30	6836
					2016-12-31	4032

## Sheet: GT 2015-2016
Google Trends relative search volume, per week 2015-2016
Week	GT
2015-01-04	7
2015-01-11	10
2015-01-18	7
2015-01-25	7
2015-02-01	11
2015-02-08	9
2015-02-15	8
2015-02-22	8
2015-03-01	10
2015-03-08	9
2015-03-15	6
2015-03-22	6
2015-03-29	12
2015-04-05	8
2015-04-12	7
2015-04-19	100
2015-04-26	11
2015-05-03	12
2015-05-10	8
2015-05-17	7
2015-05-24	6
2015-05-31	6
2015-06-07	6
2015-06-14	7
2015-06-21	6
2015-06-28	6
2015-07-05	6
2015-07-12	6
2015-07-19	5
2015-07-26	7
2015-08-02	8
2015-08-09	7
2015-08-16	14
2015-08-23	7
2015-08-30	7
2015-09-06	7
2015-09-13	8
2015-09-20	6
2015-09-27	6
2015-10-04	6
2015-10-11	6
2015-10-18	6
2015-10-25	6
2015-11-01	12
2015-11-08	10
2015-11-15	9
2015-11-22	12
2015-11-29	10
2015-12-06	7
2015-12-13	10
2015-12-20	13
2015-12-27	7
2016-01-03	6
2016-01-10	6
2016-01-17	8
2016-01-24	9
2016-01-31	6
2016-02-07	6
2016-02-14	10
2016-02-21	8
2016-02-28	9
2016-03-06	9
2016-03-13	6
2016-03-20	6
2016-03-27	7
2016-04-03	7
2016-04-10	8
2016-04-17	12
2016-04-24	14
2016-05-01	9
2016-05-08	8
2016-05-15	8
2016-05-22	8
2016-05-29	7
2016-06-05	8
2016-06-12	8
2016-06-19	8
2016-06-26	12
2016-07-03	8
2016-07-10	6
2016-07-17	7
2016-07-24	8
2016-07-31	7
2016-08-07	8
2016-08-14	7
2016-08-21	43
2016-08-28	22
2016-09-04	12
2016-09-11	11
2016-09-18	10
2016-09-25	23
2016-10-02	18
2016-10-09	10
2016-10-16	18
2016-10-23	15
2016-10-30	16
2016-11-06	9
2016-11-13	11
2016-11-20	11
2016-11-27	11
2016-12-04	11
2016-12-11	10
2016-12-18	11
2016-12-25	19

## Sheet: Posts and News 2015-2016
Facebook posts and news articles - daily data 2015 - 2016
Year	Date	Posts	News
2015	01-Jan	1	0
	02-Jan	1	0
	03-Jan	0	0
	04-Jan	0	0
	05-Jan	0	2
	06-Jan	0	0
	07-Jan	0	1
	08-Jan	1	0
	09-Jan	0	0
	10-Jan	0	0
	11-Jan	1	0
	12-Jan	0	1
	13-Jan	0	0
	14-Jan	0	0
	15-Jan	0	2
	16-Jan	1	0
	17-Jan	0	0
	18-Jan	0	0
	19-Jan	0	0
	20-Jan	0	0
	21-Jan	0	0
	22-Jan	2	0
	23-Jan	1	0
	24-Jan	0	0
	25-Jan	0	4
	26-Jan	0	2
	27-Jan	1	2
	28-Jan	0	0
	29-Jan	0	1
	30-Jan	0	0
	31-Jan	1	4
	01-Feb	0	0
	02-Feb	0	0
	03-Feb	0	0
	04-Feb	1	0
	05-Feb	0	0
	06-Feb	1	9
	07-Feb	1	0
	08-Feb	0	0
	09-Feb	0	0
	10-Feb	4	0
	11-Feb	0	0
	12-Feb	0	0
	13-Feb	1	0
	14-Feb	2	0
	15-Feb	0	0
	16-Feb	4	0
	17-Feb	0	1
	18-Feb	2	1
	19-Feb	0	0
	20-Feb	0	4
	21-Feb	17	0
	22-Feb	5	4
	23-Feb	0	5
	24-Feb	0	1
	25-Feb	1	0
	26-Feb	1	1
	27-Feb	2	2
	28-Feb	1	0
	29-Feb	0	0
	01-Mar	1	0
	02-Mar	0	0
	03-Mar	4	4
	04-Mar	1	2
	05-Mar	1	1
	06-Mar	0	0
	07-Mar	0	0
	08-Mar	0	0
	09-Mar	1	2
	10-Mar	0	0
	11-Mar	1	0
	12-Mar	0	0
	13-Mar	0	0
	14-Mar	0	0
	15-Mar	0	0
	16-Mar	1	1
	17-Mar	0	0
	18-Mar	1	0
	19-Mar	3	0
	20-Mar	0	2
	21-Mar	1	5
	22-Mar	2	0
	23-Mar	3	0
	24-Mar	1	0
	25-Mar	2	1
	26-Mar	1	0
	27-Mar	1	0
	28-Mar	1	0
	29-Mar	0	0
	30-Mar	3	0
	31-Mar	0	2
	01-Apr	1	1
	02-Apr	1	1
	03-Apr	0	0
	04-Apr	1	0
	05-Apr	1	0
	06-Apr	0	0
	07-Apr	0	1
	08-Apr	0	1
	09-Apr	0	0
	10-Apr	1	1
	11-Apr	0	0
	12-Apr	0	0
	13-Apr	0	0
	14-Apr	1	0
	15-Apr	0	1
	16-Apr	0	0
	17-Apr	1	4
	18-Apr	1	1
	19-Apr	0	0
	20-Apr	0	0
	21-Apr	0	0
	22-Apr	0	0
	23-Apr	2	0
	24-Apr	0	0
	25-Apr	7	0
	26-Apr	1	0
	27-Apr	1	1
	28-Apr	2	0
	29-Apr	2	1
	30-Apr	0	0
	01-May	1	0
	02-May	3	0
	03-May	0	0
	04-May	0	5
	05-May	2	1
	06-May	2	1
	07-May	1	0
	08-May	1	1
	09-May	0	0
	10-May	0	1
	11-May	1	0
	12-May	1	6
	13-May	1	4
	14-May	1	0
	15-May	4	0
	16-May	1	1
	17-May	0	0
	18-May	1	1
	19-May	0	1
	20-May	3	0
	21-May	0	1
	22-May	2	0
	23-May	1	0
	24-May	0	0
	25-May	0	0
	26-May	1	0
	27-May	0	1
	28-May	0	0
	29-May	0	1
	30-May	0	2
	31-May	0	0
	01-Jun	0	0
	02-Jun	0	0
	03-Jun	0	0
	04-Jun	1	0
	05-Jun	0	0
	06-Jun	0	0
	07-Jun	0	0
	08-Jun	0	0
	09-Jun	2	0
	10-Jun	1	0
	11-Jun	0	0
	12-Jun	0	0
	13-Jun	0	0
	14-Jun	0	1
	15-Jun	0	0
	16-Jun	0	1
	17-Jun	0	0
	18-Jun	0	0
	19-Jun	1	3
	20-Jun	0	1
	21-Jun	0	0
	22-Jun	0	0
	23-Jun	0	1
	24-Jun	2	0
	25-Jun	2	1
	26-Jun	1	0
	27-Jun	0	0
	28-Jun	0	0
	29-Jun	0	1
	30-Jun	0	1
	01-Jul	1	4
	02-Jul	1	1
	03-Jul	0	0
	04-Jul	0	0
	05-Jul	0	0
	06-Jul	0	5
	07-Jul	1	0
	08-Jul	0	1
	09-Jul	1	1
	10-Jul	1	0
	11-Jul	0	0
	12-Jul	0	0
	13-Jul	0	0
	14-Jul	1	0
	15-Jul	1	6
	16-Jul	0	1
	17-Jul	0	1
	18-Jul	0	0
	19-Jul	0	0
	20-Jul	0	1
	21-Jul	0	0
	22-Jul	1	0
	23-Jul	0	0
	24-Jul	0	1
	25-Jul	0	0
	26-Jul	1	1
	27-Jul	0	0
	28-Jul	2	0
	29-Jul	0	0
	30-Jul	0	2
	31-Jul	1	3
	01-Aug	1	1
	02-Aug	1	0
	03-Aug	0	4
	04-Aug	1	1
	05-Aug	3	0
	06-Aug	0	1
	07-Aug	1	0
	08-Aug	0	0
	09-Aug	1	0
	10-Aug	0	1
	11-Aug	1	2
	12-Aug	0	2
	13-Aug	1	0
	14-Aug	2	0
	15-Aug	0	0
	16-Aug	1	0
	17-Aug	0	1
	18-Aug	1	1
	19-Aug	0	3
	20-Aug	1	0
	21-Aug	0	1
	22-Aug	1	0
	23-Aug	1	0
	24-Aug	11	1
	25-Aug	14	2
	26-Aug	5	1
	27-Aug	4	0
	28-Aug	0	1
	29-Aug	0	0
	30-Aug	2	0
	31-Aug	3	0
	01-Sep	0	0
	02-Sep	0	0
	03-Sep	4	0
	04-Sep	1	0
	05-Sep	0	0
	06-Sep	1	0
	07-Sep	2	0
	08-Sep	3	1
	09-Sep	2	0
	10-Sep	1	5
	11-Sep	0	0
	12-Sep	0	0
	13-Sep	0	0
	14-Sep	0	1
	15-Sep	1	0
	16-Sep	0	0
	17-Sep	0	0
	18-Sep	0	0
	19-Sep	0	0
	20-Sep	0	0
	21-Sep	0	0
	22-Sep	3	0
	23-Sep	0	0
	24-Sep	1	0
	25-Sep	1	1
	26-Sep	1	1
	27-Sep	1	0
	28-Sep	0	0
	29-Sep	0	1
	30-Sep	2	1
	01-Oct	2	0
	02-Oct	1	0
	03-Oct	5	0
	04-Oct	0	0
	05-Oct	1	0
	06-Oct	1	0
	07-Oct	0	1
	08-Oct	7	0
	09-Oct	1	0
	10-Oct	2	0
	11-Oct	0	0
	12-Oct	2	0
	13-Oct	1	0
	14-Oct	1	0
	15-Oct	0	0
	16-Oct	1	0
	17-Oct	0	0
	18-Oct	1	1
	19-Oct	2	0
	20-Oct	1	1
	21-Oct	0	1
	22-Oct	1	0
	23-Oct	1	2
	24-Oct	0	0
	25-Oct	0	0
	26-Oct	0	0
	27-Oct	1	0
	28-Oct	2	0
	29-Oct	0	0
	30-Oct	1	0
	31-Oct	1	0
	01-Nov	0	1
	02-Nov	1	3
	03-Nov	7	2
	04-Nov	5	0
	05-Nov	7	0
	06-Nov	1	1
	07-Nov	0	0
	08-Nov	1	0
	09-Nov	1	0
	10-Nov	1	0
	11-Nov	4	2
	12-Nov	2	1
	13-Nov	5	0
	14-Nov	2	0
	15-Nov	1	0
	16-Nov	1	0
	17-Nov	3	0
	18-Nov	0	0
	19-Nov	2	0
	20-Nov	3	0
	21-Nov	2	1
	22-Nov	0	1
	23-Nov	3	0
	24-Nov	3	9
	25-Nov	1	3
	26-Nov	7	6
	27-Nov	4	0
	28-Nov	0	0
	29-Nov	0	0
	30-Nov	0	1
	01-Dec	0	0
	02-Dec	1	1
	03-Dec	3	1
	04-Dec	2	0
	05-Dec	3	0
	06-Dec	0	0
	07-Dec	9	0
	08-Dec	0	0
	09-Dec	0	1
	10-Dec	1	1
	11-Dec	2	0
	12-Dec	0	0
	13-Dec	1	1
	14-Dec	4	3
	15-Dec	1	1
	16-Dec	3	2
	17-Dec	4	7
	18-Dec	1	4
	19-Dec	4	5
	20-Dec	0	0
	21-Dec	7	0
	22-Dec	0	2
	23-Dec	4	8
	24-Dec	0	0
	25-Dec	0	0
	26-Dec	0	0
	27-Dec	1	0
	28-Dec	1	1
	29-Dec	0	0
	30-Dec	5	0
	31-Dec	4	0
2016	01-Jan	3	0
	02-Jan	6	0
	2018-01-03	0	2
	04-Jan	6	0
	05-Jan	11	1
	06-Jan	3	0
	07-Jan	7	0
	08-Jan	4	0
	09-Jan	1	0
	10-Jan	2	0
	11-Jan	6	0
	12-Jan	21	0
	13-Jan	11	0
	14-Jan	6	1
	15-Jan	9	0
	16-Jan	4	1
	17-Jan	2	0
	18-Jan	4	1
	19-Jan	9	0
	20-Jan	3	1
	21-Jan	6	0
	22-Jan	3	0
	23-Jan	2	0
	24-Jan	3	1
	25-Jan	4	3
	26-Jan	5	3
	2018-01-27	0	0
	28-Jan	2	0
	29-Jan	6	0
	30-Jan	1	0
	31-Jan	1	0
	01-Feb	2	0
	2018-02-02	0	1
	03-Feb	9	0
	04-Feb	9	2
	05-Feb	5	0
	06-Feb	4	0
	07-Feb	1	0
	08-Feb	7	0
	2018-02-09	0	3
	10-Feb	3	0
	11-Feb	2	0
	12-Feb	6	0
	13-Feb	1	0
	14-Feb	1	0
	15-Feb	5	0
	16-Feb	26	2
	17-Feb	34	1
	18-Feb	20	1
	19-Feb	19	1
	20-Feb	116	7
	21-Feb	34	3
	22-Feb	20	1
	23-Feb	11	3
	24-Feb	12	1
	25-Feb	7	7
	26-Feb	11	1
	27-Feb	4	1
	28-Feb	1	0
	29-Feb	5	0
	01-Mar	5	0
	02-Mar	9	0
	03-Mar	69	0
	04-Mar	17	0
	05-Mar	9	0
	06-Mar	7	0
	07-Mar	7	0
	08-Mar	2	1
	09-Mar	5	0
	10-Mar	3	0
	11-Mar	9	0
	12-Mar	1	0
	13-Mar	4	1
	14-Mar	4	0
	15-Mar	10	3
	16-Mar	13	2
	17-Mar	7	0
	18-Mar	8	0
	19-Mar	2	0
	20-Mar	13	0
	21-Mar	5	0
	22-Mar	3	0
	23-Mar	3	0
	24-Mar	4	0
	25-Mar	4	0
	26-Mar	14	0
	27-Mar	7	1
	28-Mar	5	0
	29-Mar	12	3
	30-Mar	11	0
	31-Mar	7	1
	01-Apr	9	0
	02-Apr	8	1
	03-Apr	5	0
	04-Apr	4	0
	05-Apr	10	0
	06-Apr	11	0
	07-Apr	3	2
	08-Apr	5	1
	09-Apr	5	0
	10-Apr	2	0
	11-Apr	9	1
	12-Apr	18	1
	13-Apr	62	0
	14-Apr	12	0
	15-Apr	5	0
	16-Apr	2	3
	17-Apr	6	0
	18-Apr	3	1
	19-Apr	10	0
	20-Apr	8	2
	21-Apr	4	2
	22-Apr	1	2
	23-Apr	3	0
	24-Apr	23	0
	25-Apr	15	0
	26-Apr	4	0
	27-Apr	1	0
	28-Apr	5	1
	29-Apr	9	0
	30-Apr	9	0
	01-May	4	0
	02-May	5	0
	03-May	4	0
	04-May	10	3
	05-May	6	1
	06-May	7	2
	07-May	2	0
	08-May	6	0
	09-May	11	0
	10-May	14	3
	11-May	1	1
	12-May	13	1
	13-May	8	1
	14-May	2	0
	15-May	5	0
	16-May	5	0
	17-May	18	0
	18-May	6	0
	19-May	3	0
	20-May	22	0
	21-May	2	0
	22-May	6	0
	23-May	16	0
	24-May	15	2
	25-May	16	2
	26-May	5	3
	27-May	11	2
	28-May	6	2
	29-May	4	0
	30-May	7	0
	31-May	6	0
	01-Jun	5	1
	02-Jun	22	1
	03-Jun	20	0
	04-Jun	39	0
	05-Jun	140	0
	06-Jun	36	0
	07-Jun	28	0
	08-Jun	20	4
	09-Jun	15	2
	10-Jun	11	2
	11-Jun	16	1
	12-Jun	6	0
	13-Jun	8	0
	14-Jun	5	0
	15-Jun	2	0
	16-Jun	3	1
	17-Jun	19	1
	18-Jun	9	0
	19-Jun	8	0
	20-Jun	12	0
	21-Jun	8	0
	22-Jun	12	0
	23-Jun	12	2
	24-Jun	9	0
	25-Jun	7	0
	26-Jun	15	0
	27-Jun	6	1
	28-Jun	3	1
	29-Jun	3	1
	30-Jun	5	0
	01-Jul	3	0
	02-Jul	2	2
	03-Jul	8	1
	04-Jul	2	0
	05-Jul	3	0
	06-Jul	2	0
	07-Jul	4	0
	08-Jul	4	2
	09-Jul	3	0
	2018-07-10	0	4
	11-Jul	11	1
	12-Jul	5	0
	13-Jul	2	0
	14-Jul	20	0
	15-Jul	9	1
	16-Jul	1	0
	17-Jul	1	1
	18-Jul	3	0
	19-Jul	11	0
	20-Jul	19	0
	21-Jul	13	1
	22-Jul	11	0
	2018-07-23	0	2
	24-Jul	4	0
	25-Jul	7	0
	26-Jul	4	0
	27-Jul	9	1
	28-Jul	7	0
	29-Jul	7	2
	30-Jul	6	1
	31-Jul	4	0
	01-Aug	3	1
	02-Aug	2	4
	03-Aug	1	0
	04-Aug	9	0
	05-Aug	7	0
	06-Aug	1	0
	07-Aug	1	0
	2018-08-08	0	0
	09-Aug	8	0
	10-Aug	6	0
	11-Aug	4	0
	12-Aug	8	0
	2018-08-13	0	1
	14-Aug	1	0
	15-Aug	4	0
	16-Aug	5	0
	17-Aug	3	0
	18-Aug	13	0
	19-Aug	2	1
	20-Aug	2	0
	21-Aug	6	1
	22-Aug	6	0
	23-Aug	5	0
	2018-08-24	0	2
	25-Aug	4	0
	26-Aug	7	7
	27-Aug	7	3
	28-Aug	3	1
	29-Aug	10	1
	30-Aug	7	2
	31-Aug	12	1
	01-Sep	1	2
	02-Sep	9	0
	03-Sep	12	1
	04-Sep	4	1
	05-Sep	3	1
	06-Sep	4	0
	07-Sep	9	0
	08-Sep	6	2
	09-Sep	12	0
	10-Sep	11	0
	11-Sep	3	0
	12-Sep	5	1
	13-Sep	9	0
	14-Sep	6	0
	15-Sep	16	0
	16-Sep	8	2
	17-Sep	5	2
	18-Sep	7	0
	19-Sep	30	4
	20-Sep	31	1
	21-Sep	15	2
	22-Sep	15	1
	23-Sep	22	2
	24-Sep	45	0
	25-Sep	24	6
	26-Sep	34	3
	27-Sep	21	2
	28-Sep	84	41
	29-Sep	105	23
	30-Sep	44	9
	01-Oct	20	2
	02-Oct	28	1
	03-Oct	18	1
	04-Oct	50	7
	05-Oct	77	11
	06-Oct	41	6
	07-Oct	28	3
	08-Oct	34	2
	09-Oct	14	5
	10-Oct	6	1
	11-Oct	8	3
	12-Oct	29	9
	13-Oct	14	6
	14-Oct	13	1
	15-Oct	17	0
	16-Oct	9	0
	17-Oct	11	4
	18-Oct	16	3
	19-Oct	54	0
	20-Oct	21	0
	21-Oct	21	4
	22-Oct	6	3
	23-Oct	12	2
	24-Oct	11	2
	25-Oct	12	0
	26-Oct	16	2
	27-Oct	27	1
	28-Oct	3	1
	29-Oct	6	0
	30-Oct	11	3
	31-Oct	13	0
	01-Nov	11	1
	02-Nov	12	1
	03-Nov	11	1
	04-Nov	9	0
	05-Nov	3	0
	06-Nov	10	0
	07-Nov	2	1
	08-Nov	12	0
	09-Nov	7	0
	10-Nov	11	2
	11-Nov	15	1
	12-Nov	11	0
	13-Nov	6	0
	14-Nov	10	0
	15-Nov	31	3
	16-Nov	31	7
	17-Nov	47	1
	18-Nov	19	1
	19-Nov	17	0
	20-Nov	8	1
	21-Nov	23	0
	22-Nov	14	2
	23-Nov	17	0
	24-Nov	15	2
	25-Nov	20	1
	26-Nov	4	0
	27-Nov	5	0
	28-Nov	11	1
	29-Nov	13	1
	30-Nov	10	0
	01-Dec	5	0
	02-Dec	1	0
	03-Dec	1	0
	04-Dec	2	0
	05-Dec	13	0
	06-Dec	6	1
	07-Dec	4	1
	08-Dec	3	0
	09-Dec	7	0
	2018-12-10	0	0
	11-Dec	4	0
	12-Dec	6	0
	13-Dec	7	0
	14-Dec	8	0
	15-Dec	5	1
	16-Dec	7	1
	17-Dec	1	0
	18-Dec	8	0
	19-Dec	8	6
	20-Dec	5	0
	21-Dec	37	3
	22-Dec	74	7
	23-Dec	29	1
	24-Dec	11	2
	25-Dec	1	0
	26-Dec	6	1
	27-Dec	22	3
	28-Dec	19	16
	29-Dec	25	9
	30-Dec	14	4
	31-Dec	10	5
